# Supplementary material for: Mediterranean diet intervention alters the gut microbiome in older people reducing frailty and improving health status: the NU-AGE 1-year dietary intervention across five European countries
Source: HighWire-hosted journal article supplement (doi:10.1136/gutjnl-2019-319654), 2020-02-17
Supplement: gutjnl-2019-319654supp001_data_supplement.pdf [file gutjnl-2019-319654supp001_data_supplement.pdf]

Supplementary Table 1: Numbers and demographics of subjects in control and intervention cohorts

|                                       | Controls            |                     |                    |                     |                   |                        | MedDiet Intervention |                      |                      |                   |                   |                     |
|---------------------------------------|---------------------|---------------------|--------------------|---------------------|-------------------|------------------------|----------------------|----------------------|----------------------|-------------------|-------------------|---------------------|
|                                       | All Countries       | Italy               | UK                 | Netherlands         | Poland            | France                 | All Countries        | Italy                | UK                   | Netherlands       | Poland            | France              |
| Individuals with sequenced microbiome | 289                 | 91                  | 16                 | 37                  | 105               | 40                     | 324                  | 112                  | 32                   | 38                | 112               | 39                  |
| Median Age (Min-Max)                  | 71<br>(65-79)       | 72<br>(65-79)       | 70.5<br>(65-79)    | 71.5<br>(65-79)     | 72<br>(65-79)     | 68<br>(65-77)          | 71<br>(65-79)        | 72<br>(65-79)        | 70.5<br>(65-79)      | 71.5<br>(65-79)   | 72<br>(65-79)     | 68<br>(65-72)       |
| Gender (Male:Female)                  | 145:144             | 46:45               | 7:9                | 21:16               | 46:59             | 25:15                  | 141:182              | 56:56                | 12:20                | 13:25             | 45:67             | 15:24               |
| Median BMI (Min-Max)                  | 26.8<br>(18.8-44.6) | 26.4<br>(18.8-44.6) | 27.20<br>(20-31.5) | 26.7<br>(19.7-35.1) | 26.4<br>(21-37.6) | 25.05<br>(18.9 – 37.5) | 26.9<br>(18.5-46)    | 27.15<br>(18.7-37.9) | 25.95<br>(18.5-33.7) | 25<br>(20.3-35.8) | 28.1<br>(19.5-46) | 24.3<br>(19.7-31.3) |

\*: Baseline
