# Supplementary material for: Mediterranean diet intervention alters the gut microbiome in older people reducing frailty and improving health status: the NU-AGE 1-year dietary intervention across five European countries
Source: HighWire-hosted journal article supplement (doi:10.1136/gutjnl-2019-319654), 2020-02-17
Supplement: gutjnl-2019-319654supp006_data_supplement.pdf [file gutjnl-2019-319654supp006_data_supplement.pdf]

**Supplementary Table 2:** List of top 129 OTU markers obtained using the Random Forest approach for the prediction of dietary compliance scores, along with their SPINGO classifications, association with food scores as well as the ranked feature importance scores for the baseline and followup time points

| OTU       | Ranked Feature Correlation |           | Genus            | Species                       | Final                         |
|-----------|----------------------------|-----------|------------------|-------------------------------|-------------------------------|
|           | Baseline                   | Follow-up |                  |                               |                               |
| OTU_4560  | 0.99412752                 | 0.5041946 | Unclassified     | Unclassified                  | Unclassified                  |
| OTU_3114  | 0.98993289                 | 0.9798658 | Faecalibacterium | Faecalibacterium_prausnitzii  | Faecalibacterium_prausnitzii  |
| OTU_147   | 0.86996644                 | 0.9941275 | Unclassified     | Unclassified                  | Unclassified                  |
| OTU_1205  | 0.95721477                 | 0.9530201 | Unclassified     | Unclassified                  | Unclassified                  |
| OTU_300   | 0.96224832                 | 0.9102349 | Unclassified     | Unclassified                  | Unclassified                  |
| OTU_584   | 0.98573826                 | 0.9916107 | Faecalibacterium | Faecalibacterium_prausnitzii  | Faecalibacterium_prausnitzii  |
| OTU_69    | 0.99832215                 | 0.6526846 | Unclassified     | Unclassified                  | Unclassified                  |
| OTU_336   | 0.97986577                 | 0.9781879 | Roseburia        | Unclassified                  | Roseburia_Unclassified        |
| OTU_207   | 0.98238255                 | 0.2332215 | Unclassified     | Unclassified                  | Unclassified                  |
| OTU_11233 | 0.2307047                  | 0.9983221 | Blautia          | Ruminococcus_torques          | Ruminococcus_torques          |
| OTU_67    | 0.97651007                 | 0.9974832 | Unclassified     | Unclassified                  | Unclassified                  |
| OTU_5978  | 0.98909396                 | 0.658557  | Unclassified     | Unclassified                  | Unclassified                  |
| OTU_79    | 0.85151007                 | 0.9899329 | Eubacterium      | Eubacterium_xylanophilum      | Eubacterium_xylanophilum      |
| OTU_131   | 0.90855705                 | 0.9639262 | Unclassified     | Unclassified                  | Unclassified                  |
| OTU_1093  | 0.99496644                 | 0.9211409 | Anaerostipes     | Unclassified                  | Anaerostipes_Unclassified     |
| OTU_24    | 0.93875839                 | 0.8557047 | Unclassified     | Unclassified                  | Unclassified                  |
| OTU_36    | 0.79026846                 | 0.9630872 | Prevotella       | Prevotella_copri              | Prevotella_copri              |
| OTU_364   | 0.8909396                  | 0.9513423 | Clostridium      | Clostridium_lactatifermentans | Clostridium_lactatifermentans |
| OTU_12121 | 0.95553691                 | 0.8842282 | Eubacterium      | Eubacterium_eligens           | Eubacterium_eligens           |
| OTU_2352  | 0.95302013                 | 0.1082215 | Blautia          | Unclassified                  | Blautia_Unclassified          |
| OTU_1569  | 0.97902685                 | 0.8213087 | Clostridium      | Unclassified                  | Clostridium_Unclassified      |
| OTU_139   | 0.96979866                 | 0.9991611 | Clostridium      | Unclassified                  | Clostridium_Unclassified      |
| OTU_1006  | 0.41694631                 | 0.9714765 | Prevotella       | Prevotella_copri              | Prevotella_copri              |
| OTU_1740  | 0.97147651                 | 0.8708054 | Unclassified     | Unclassified                  | Unclassified                  |
| OTU_103   | 0.9295302                  | 0.9437919 | Unclassified     | Unclassified                  | Unclassified                  |
| OTU_9966  | 0.97315436                 | 0.7709732 | Unclassified     | Unclassified                  | Unclassified                  |
| OTU_8631  | 0.14177852                 | 0.9446309 | Prevotella       | Prevotella_copri              | Prevotella_copri              |
| OTU_3603  | 0.68959732                 | 0.9865772 | Unclassified     | Unclassified                  | Unclassified                  |

|           |            |           |                  |                              |                              |
|-----------|------------|-----------|------------------|------------------------------|------------------------------|
| OTU_1594  | 0.94211409 | 0.8011745 | Eubacterium      | Eubacterium_rectale          | Eubacterium_rectale          |
| OTU_32    | 0.98741611 | 0.9505034 | Eubacterium      | Eubacterium_eligens          | Eubacterium_eligens          |
| OTU_124   | 0.56459732 | 0.9731544 | Unclassified     | Unclassified                 | Unclassified                 |
| OTU_11498 | 0.23238255 | 0.989094  | Anaerostipes     | Anaerostipes_hadrus          | Anaerostipes_hadrus          |
| OTU_250   | 0.76090604 | 0.9790268 | Unclassified     | Unclassified                 | Unclassified                 |
| OTU_1221  | 0.95385906 | 0.9236577 | Faecalibacterium | Faecalibacterium_prausnitzii | Faecalibacterium_prausnitzii |
| OTU_306   | 0.7533557  | 0.977349  | Clostridium      | Unclassified                 | Clostridium_Unclassified     |
| OTU_120   | 0.9488255  | 0.4697987 | Unclassified     | Unclassified                 | Unclassified                 |
| OTU_1069  | 0.9647651  | 0.9966443 | Clostridium      | Clostridium_disporicum       | Clostridium_disporicum       |
| OTU_30    | 0.93791946 | 0.9127517 | Clostridium      | Clostridium_ruminantium      | Clostridium_ruminantium      |
| OTU_11429 | 0.97399329 | 0.7927852 | Blautia          | Unclassified                 | Blautia_Unclassified         |
| OTU_8606  | 0.50838926 | 0.9572148 | Unclassified     | Unclassified                 | Unclassified                 |
| OTU_233   | 0.84563758 | 0.9463087 | Eggerthella      | Eggerthella_lenta            | Eggerthella_lenta            |
| OTU_6577  | 0.88255034 | 0.9488255 | Blautia          | Blautia_faecis               | Blautia_faecis               |
| OTU_64    | 0.77097315 | 0.9924497 | Clostridium      | Unclassified                 | Clostridium_Unclassified     |
| OTU_86    | 0.92785235 | 0.9412752 | Bacteroides      | Bacteroides_thetaiotaomicron | Bacteroides_thetaiotaomicron |
| OTU_273   | 0.59647651 | 0.9689597 | Clostridium      | Unclassified                 | Clostridium_Unclassified     |
| OTU_1280  | 0.94295302 | 0.2944631 | Coprococcus      | Coprococcus_catus            | Coprococcus_catus            |
| OTU_144   | 0.51677852 | 0.9521812 | Parabacteroides  | Unclassified                 | Unclassified                 |
| OTU_3372  | 0.70469799 | 0.9555369 | Ruminococcus     | Ruminococcus_bromii          | Ruminococcus_bromii          |
| OTU_12119 | 0.98322148 | 0.6417785 | Unclassified     | Unclassified                 | Unclassified                 |
| OTU_4016  | 0.94798658 | 0.3011745 | Unclassified     | Unclassified                 | Unclassified                 |
| OTU_6257  | 0.89597315 | 0.9379195 | Roseburia        | Roseburia_hominis            | Roseburia_hominis            |
| OTU_2604  | 0.96057047 | 0.8808725 | Blautia          | Blautia_faecis               | Blautia_faecis               |
| OTU_3860  | 0.94043624 | 0.817953  | Blautia          | Ruminococcus_obeum           | Ruminococcus_obeum           |
| OTU_470   | 0.97231544 | 0.4010067 | Unclassified     | Unclassified                 | Unclassified                 |
| OTU_21    | 0.96560403 | 0.965604  | Anaerostipes     | Anaerostipes_hadrus          | Anaerostipes_hadrus          |
| OTU_109   | 0.97483221 | 0.8372483 | Clostridium      | Clostridium_leptum           | Clostridium_leptum           |
| OTU_105   | 0.95637584 | 0.909396  | Barnesiella      | Barnesiella_intestinihominis | Barnesiella_intestinihominis |
| OTU_195   | 0.94379195 | 0.8833893 | Unclassified     | Unclassified                 | Unclassified                 |
| OTU_3501  | 0.55201342 | 0.9932886 | Clostridium      | Unclassified                 | Clostridium_Unclassified     |
| OTU_9359  | 0.87248322 | 0.9387584 | Faecalibacterium | Faecalibacterium_prausnitzii | Faecalibacterium_prausnitzii |
| OTU_168   | 0.87332215 | 0.9706376 | Unclassified     | Unclassified                 | Unclassified                 |

|          |            |           |                  |                              |                              |
|----------|------------|-----------|------------------|------------------------------|------------------------------|
| OTU_3985 | 0.97063758 | 0.9110738 | Faecalibacterium | Faecalibacterium_prausnitzii | Faecalibacterium_prausnitzii |
| OTU_34   | 0.9614094  | 0.8598993 | Eubacterium      | Eubacterium_hallii           | Eubacterium_hallii           |
| OTU_1356 | 0.73657718 | 0.9681208 | Unclassified     | Unclassified                 | Unclassified                 |
| OTU_5591 | 0.95050336 | 0.7063758 | Unclassified     | Unclassified                 | Unclassified                 |
| OTU_704  | 0.88422819 | 0.9404362 | Unclassified     | Unclassified                 | Unclassified                 |
| OTU_57   | 0.93959732 | 0.9244966 | Eubacterium      | Eubacterium_desmolans        | Eubacterium_desmolans        |
| OTU_16   | 0.96895973 | 0.9312081 | Bifidobacterium  | Bifidobacterium_longum       | Bifidobacterium_longum       |
| OTU_4302 | 0.96812081 | 0.8364094 | Bifidobacterium  | Bifidobacterium_longum       | Bifidobacterium_longum       |
| OTU_952  | 0.97567114 | 0.7206376 | Eubacterium      | Unclassified                 | Eubacterium_Unclassified     |
| OTU_179  | 0.96644295 | 0.1635906 | Unclassified     | Unclassified                 | Unclassified                 |
| OTU_263  | 0.84647651 | 0.9614094 | Veillonella      | Veillonella_dispar           | Veillonella_dispar           |
| OTU_789  | 0.9840604  | 0.4572148 | Parabacteroides  | Parabacteroides_distasonis   | Parabacteroides_distasonis   |
| OTU_695  | 0.94714765 | 0.7986577 | Blautia          | Unclassified                 | Blautia_Unclassified         |
| OTU_49   | 0.64765101 | 0.9395973 | Eubacterium      | Eubacterium_siraeum          | Eubacterium_siraeum          |
| OTU_178  | 0.9454698  | 0.9723154 | Unclassified     | Unclassified                 | Unclassified                 |
| OTU_152  | 0.9807047  | 0.738255  | Unclassified     | Unclassified                 | Unclassified                 |
| OTU_7093 | 0.55033557 | 0.9597315 | Unclassified     | Unclassified                 | Unclassified                 |
| OTU_2056 | 0.88842282 | 0.9823826 | Unclassified     | Unclassified                 | Unclassified                 |
| OTU_6936 | 0.01510067 | 0.9907718 | Unclassified     | Unclassified                 | Unclassified                 |
| OTU_1034 | 0.57969799 | 0.9496644 | Unclassified     | Unclassified                 | Unclassified                 |
| OTU_2345 | 0.65604027 | 0.9739933 | Unclassified     | Unclassified                 | Unclassified                 |
| OTU_1    | 0.85234899 | 0.942953  | Eubacterium      | Eubacterium_rectale          | Eubacterium_rectale          |
| OTU_4661 | 0.95889262 | 0.8473154 | Clostridium      | Unclassified                 | Clostridium_Unclassified     |
| OTU_1914 | 0.36577181 | 0.9647651 | Clostridium      | Unclassified                 | Clostridium_Unclassified     |
| OTU_98   | 0.86157718 | 0.9471477 | Clostridium      | Unclassified                 | Clostridium_Unclassified     |
| OTU_1621 | 1          | 0.9169463 | Unclassified     | Unclassified                 | Unclassified                 |
| OTU_7618 | 0.96728188 | 0.7994966 | Blautia          | Blautia_faecis               | Blautia_faecis               |
| OTU_89   | 0.9135906  | 0.9538591 | Eubacterium      | Eubacterium_ventriosum       | Eubacterium_ventriosum       |
| OTU_162  | 0.89848993 | 0.9848993 | Flavonifractor   | Flavonifractor_plautii       | Flavonifractor_plautii       |
| OTU_45   | 0.94630872 | 0.9840604 | Clostridium      | Unclassified                 | Clostridium_Unclassified     |
| OTU_287  | 0.94966443 | 0.7718121 | Unclassified     | Unclassified                 | Unclassified                 |
| OTU_23   | 0.90520134 | 0.9672819 | Clostridium      | Clostridium_ramosum          | Clostridium_ramosum          |
| OTU_11   | 0.87080537 | 0.9421141 | Blautia          | Blautia_luti                 | Blautia_luti                 |

|           |            |           |               |                              |                              |
|-----------|------------|-----------|---------------|------------------------------|------------------------------|
| OTU_10307 | 0.96308725 | 0.7583893 | Clostridium   | Unclassified                 | Clostridium_Unclassified     |
| OTU_22    | 0.89765101 | 0.9765101 | Ruminococcus  | Unclassified                 | Ruminococcus_Unclassified    |
| OTU_1582  | 0.8716443  | 0.9454698 | Unclassified  | Unclassified                 | Unclassified                 |
| OTU_9740  | 0.38926174 | 0.954698  | Unclassified  | Unclassified                 | Unclassified                 |
| OTU_307   | 0.74412752 | 0.9479866 | Clostridium   | Unclassified                 | Clostridium_Unclassified     |
| OTU_384   | 0.60067114 | 0.9815436 | Unclassified  | Unclassified                 | Unclassified                 |
| OTU_347   | 0.87416107 | 0.9857383 | Clostridium   | Unclassified                 | Clostridium_Unclassified     |
| OTU_84    | 0.86493289 | 0.9832215 | Unclassified  | Unclassified                 | Unclassified                 |
| OTU_2336  | 0.95973154 | 0.7625839 | Blautia       | Unclassified                 | Blautia_Unclassified         |
| OTU_4369  | 0.60151007 | 0.9563758 | Clostridium   | Clostridium_aldenense        | Clostridium_aldenense        |
| OTU_65    | 0.88674497 | 0.9580537 | Unclassified  | Unclassified                 | Unclassified                 |
| OTU_719   | 0.94127517 | 0.7365772 | Clostridium   | Unclassified                 | Clostridium_Unclassified     |
| OTU_414   | 0.34312081 | 0.9605705 | Mogibacterium | Unclassified                 | Mogibacterium_Unclassified   |
| OTU_5014  | 0.98489933 | 0.9697987 | Blautia       | Ruminococcus_torques         | Ruminococcus_torques         |
| OTU_5819  | 0.94463087 | 0.7197987 | Clostridium   | Clostridium_sporosphaeroides | Clostridium_sporosphaeroides |
| OTU_125   | 0.9966443  | 0.454698  | Unclassified  | Unclassified                 | Unclassified                 |
| OTU_10029 | 0.76677852 | 0.9622483 | Unclassified  | Unclassified                 | Unclassified                 |
| OTU_5862  | 0.97734899 | 0.579698  | Actinomyces   | Actinomyces_lingnae          | Actinomyces_lingnae          |
| OTU_945   | 0.85067114 | 0.9807047 | Unclassified  | Unclassified                 | Unclassified                 |
| OTU_447   | 0.99580537 | 0.9152685 | Unclassified  | Unclassified                 | Unclassified                 |
| OTU_375   | 0.95469799 | 0.7919463 | Clostridium   | Clostridium_methylpentosum   | Clostridium_methylpentosum   |
| OTU_1637  | 0.99244966 | 0.8733221 | Unclassified  | Unclassified                 | Unclassified                 |
| OTU_11425 | 0.96392617 | 0.3833893 | Blautia       | Ruminococcus_torques         | Ruminococcus_torques         |
| OTU_8952  | 0.98825503 | 0.9874161 | Coprococcus   | Coprococcus_comes            | Coprococcus_comes            |
| OTU_291   | 0.95134228 | 0.9958054 | Collinsella   | Collinsella_aerofaciens      | Collinsella_aerofaciens      |
| OTU_52    | 0.98657718 | 0.966443  | Eubacterium   | Eubacterium_ramulus          | Eubacterium_ramulus          |
| OTU_3602  | 0.95218121 | 0.9161074 | Unclassified  | Unclassified                 | Unclassified                 |
| OTU_10880 | 0.95805369 | 0.8716443 | Blautia       | Unclassified                 | Blautia_Unclassified         |
| OTU_14    | 0.98154362 | 1         | Collinsella   | Collinsella_aerofaciens      | Collinsella_aerofaciens      |
| OTU_27    | 0.97818792 | 0.9756711 | Coprococcus   | Coprococcus_comes            | Coprococcus_comes            |
| OTU_9293  | 0.99748322 | 0.9144295 | Blautia       | Ruminococcus_torques         | Ruminococcus_torques         |
| OTU_53    | 0.99077181 | 0.9949664 | Blautia       | Ruminococcus_torques         | Ruminococcus_torques         |
| OTU_1248  | 0.99161074 | 0.9588926 | Unclassified  | Unclassified                 | Unclassified                 |

|          |            |           |       |                       |                       |
|----------|------------|-----------|-------|-----------------------|-----------------------|
| OTU_76   | 0.99916107 | 0.988255  | Dorea | Dorea_formicigenerans | Dorea_formicigenerans |
| OTU_7369 | 0.99328859 | 0.9748322 | Dorea | Dorea_formicigenerans | Dorea_formicigenerans |
