# Supplementary material for: Mediterranean diet intervention alters the gut microbiome in older people reducing frailty and improving health status: the NU-AGE 1-year dietary intervention across five European countries
Source: HighWire-hosted journal article supplement (doi:10.1136/gutjnl-2019-319654), 2020-02-17
Supplement: gutjnl-2019-319654supp010_data_supplement.pdf [file gutjnl-2019-319654supp010_data_supplement.pdf]

Supplementary Table 4: Number of samples classified to various iBBiG modules

| iBBiG Modules | Number of Samples |
|---------------|-------------------|
| a             | 1236              |
| b             | 420               |
| d             | 294               |
| c             | 262               |
| f             | 65                |
| e             | 44                |
