# Supplementary material for: Mediterranean diet intervention alters the gut microbiome in older people reducing frailty and improving health status: the NU-AGE 1-year dietary intervention across five European countries
Source: PubMed Central journal article supplement — Gut. 2020 Feb 17;69(7):1218–28. doi: 10.1136/gutjnl-2019-319654 (PMC7306987; doi:10.1136/gutjnl-2019-319654), 2020-02-17
Supplement: gutjnl-2019-319654supp013.pdf [file gutjnl-2019-319654supp013.pdf]

Supplementary Table 5: List of A) Frailty and Cognitive Function associated measures and B) Cytokines used for performing association analysis with the diet modulated microbiome components.

(A)

| Category              | Measure                    | Description                                                                                         | Directionality                                |
|-----------------------|----------------------------|-----------------------------------------------------------------------------------------------------|-----------------------------------------------|
| Physical Frailty      | Hand Grip Strength         | Mean hand grip strength of the dominant hand (3 trials)                                             | Negatively associated with frailty            |
|                       | Gait Speed (Fastest time)  | Gait Speed Fastest Time taken (2 trials)                                                            | Positively associated with frailty            |
|                       | Fried Score                | Fried Score for computing frailty                                                                   | Positively associated with frailty            |
| Cognitive Functioning | Geriatric Depression Score | Score for measuring geriatric depression (higher values indicate depression)                        | Negatively associated with cognitive function |
|                       | MMSE                       | Mini Mental State Examination (Scores range 0-30). Higher scores indicate better cognitive function | Positively associated with cognitive function |
|                       | BabCok Memory Score        | Bab Cock Score for immediate recall                                                                 | Positively associated with cognitive function |
|                       | CAMDEX-Q Scores            | Cambridge Examination of Mental Disorders                                                           | Positively associated with cognitive function |
|                       | Constructional Praxis      | CERAD Battery Total Score on Constructional Praxis                                                  | Positively associated with cognitive function |
|                       | Verbal Fluency             | CERAD Battery Total Score on Verbal Fluency Categories                                              | Positively associated with cognitive function |

(B)

**Cytokines**

IL-13  
 Pentraxin-3  
 Adiponectin  
 TNF-A  
 G-CSF  
 IL-8  
 Ghrelin  
 IL-6  
 Resistin  
 hsCRP

IL-1b  
TGF-b1  
IL-4  
IL-17  
IL-1ra  
IL-2  
Leptin  
sTNF-R1  
IFN-g  
IL-7  
IL-12 p70  
sGP130  
GM-CSF  
IL-5  
sIL-6ra  
MIP-1b  
IL-10  
MCP-1-MCAF  
IL-18  
sTNF-R2  
IL-17a
