# Supplementary material for: Mediterranean diet intervention alters the gut microbiome in older people reducing frailty and improving health status: the NU-AGE 1-year dietary intervention across five European countries
Source: PubMed Central journal article supplement — Gut. 2020 Feb 17;69(7):1218–28. doi: 10.1136/gutjnl-2019-319654 (PMC7306987; doi:10.1136/gutjnl-2019-319654), 2020-02-17
Supplement: gutjnl-2019-319654supp014.pdf [file gutjnl-2019-319654supp014.pdf]

## SUPPLEMENTARY TEXT 8

### ASSOCIATION OF MICROBIOME INDEX WITH THE DIFFERENT DIETARY COMPONENTS

Next, given that we calculated the microbiome index as a single value index providing a quantitative summary of the abundance patterns of the diet-associated markers (the higher the value, the higher the abundance of Diet-Positive taxa and the lower the abundance of Diet-Negative taxa, and vice-versa), as a sanity-check, it is important to validate that the calculated microbiome index captured the association patterns of the individual diet-associated marker OTUs. For this, we repeated the analysis performed earlier for the individual marker OTUs (**Supplementary figure 12**) on the overall microbiome index (after adjustment for confounders) (**Supplementary figure 13**).
