# Supplementary material for: Mediterranean diet intervention alters the gut microbiome in older people reducing frailty and improving health status: the NU-AGE 1-year dietary intervention across five European countries
Source: PubMed Central journal article supplement — Gut. 2020 Feb 17;69(7):1218–28. doi: 10.1136/gutjnl-2019-319654 (PMC7306987; doi:10.1136/gutjnl-2019-319654), 2020-02-17
Supplement: gutjnl-2019-319654supp017.pdf [file gutjnl-2019-319654supp017.pdf]

Supplementary Table 6: A. Number of subjects with gut microbiome profiles at baseline that belong to the different disease categories (no\_disease refers to those individuals who were not identified with any disease symptoms). B. Results of the Mann-Whitney test based comparative analysis of the diet-associated microbiome indices for the individuals with different diseases with control (no\_disease type) individuals at baseline

(A)

| Disease_Type        | Number of Subjects |
|---------------------|--------------------|
| no_disease          | 324                |
| high_cholesterol    | 183                |
| thyroid             | 61                 |
| diabetes            | 30                 |
| cancer              | 27                 |
| hypertension        | 21                 |
| food_allergy        | 15                 |
| respiratory_disease | 14                 |
| swollen_ankle       | 10                 |
| kidney_disease      | 6                  |
| heart_disease       | 5                  |
| inflammation        | 3                  |

(B)

| Disease Type        | Diet-Associated Microbiome Index |                      |
|---------------------|----------------------------------|----------------------|
|                     | Direction                        | Mann-Whitney P-value |
| hypertension        | Lower In Disease                 | 0.005346             |
| diabetes            | Lower In Disease                 | 0.005646             |
| inflammation        | Lower In Disease                 | 0.02727              |
| cancer              | Lower In Disease                 | 0.097                |
| respiratory_disease | Lower In Disease                 | 0.1642               |
| food_allergy        | Lower In Disease                 | 0.2569               |
| swollen_ankle       | Lower In Disease                 | 0.3086               |
| heart_disease       | Lower In Disease                 | 0.3212               |
| high_cholesterol    | Lower In Disease                 | 0.4621               |
| kidney_disease      | Higher In Disease                | 0.7945               |
| thyroid             | Higher In Disease                | 0.8938               |
